# “*Candidatus Siderophilus nitratireducens*”: a putative *nap*-dependent nitrate-reducing iron oxidizer within the new order Siderophiliales

Francesc Corbera-Rubio<sup>1</sup>, Gerben R. Stouten<sup>1</sup>, Jantinus Bruins<sup>2</sup>, Simon F. Dost<sup>3</sup>, Alexander Y. Merkel<sup>4</sup>, Simon Müller<sup>1</sup>, Mark C.M. van Loosdrecht<sup>1</sup>, Doris van Halem<sup>1</sup>, Michele Lauren<sup>1,\*</sup>

<sup>1</sup>Delft University of Technology, Stevinweg 1, 2628 CN Delft, the Netherlands

<sup>2</sup>WLN, Rijksweg 85, 9756 AD Glimmen, the Netherlands

<sup>3</sup>WMD Water Company Drenthe, Lauwers 3, 9405 BL Assen, the Netherlands

<sup>4</sup>Winogradsky Institute of Microbiology, Research Center of Biotechnology, Russian Academy of Sciences, 60 let Oktjabrja pr-t, 7, bld. 2, 117312 Moscow, Russia

\*Corresponding author: Michele Lauren, Civil Engineering and Geosciences Faculty, Delft University of Technology, Stevinweg 1, 2628 CN Delft, The Netherlands. Email: m.lauren@tudelft.nl

## Abstract

Nitrate leaching from agricultural soils is increasingly found in groundwater, a primary source of drinking water worldwide. This nitrate influx can potentially stimulate the biological oxidation of iron in anoxic groundwater reservoirs. Nitrate-dependent iron-oxidizing (NDFO) bacteria have been extensively studied in laboratory settings, yet their ecophysiology in natural environments remains largely unknown. To this end, we established a pilot-scale filter on nitrate-rich groundwater to elucidate the structure and metabolism of nitrate-reducing iron-oxidizing microbiomes under oligotrophic conditions mimicking natural groundwaters. The enriched community stoichiometrically removed iron and nitrate consistently with the NDFO metabolism. Genome-resolved metagenomics revealed the underlying metabolic network between the dominant iron-dependent denitrifying autotrophs and the less abundant organoheterotrophs. The most abundant genome belonged to a new *Candidatus* order, named Siderophiliales. This new species, “*Candidatus Siderophilus nitratireducens*,” carries genes central genes to iron oxidation (cytochrome *c* *cyc2*), carbon fixation (*rbc*), and for the sole periplasmic nitrate reductase (*nap*). Using thermodynamics, we demonstrate that iron oxidation coupled to *nap* based dissimilatory reduction of nitrate to nitrite is energetically favorable under realistic  $\text{Fe}^{3+}/\text{Fe}^{2+}$  and  $\text{NO}_3^-/\text{NO}_2^-$  concentration ratios. Ultimately, by bridging the gap between laboratory investigations and nitrate real-world conditions, this study provides insights into the intricate interplay between nitrate and iron in groundwater ecosystems, and expands our understanding of NDFOs taxonomic diversity and ecological role.

**Keywords:** NDFO, iron, nitrate, groundwater

## Introduction

Globally, approximately one-third of the nitrogen applied to agricultural soils is lost via leaching to the surrounding waterbodies [1]. This has led to elevated nitrate ( $\text{NO}_3^-$ ) levels in anoxic groundwaters, a primary source of drinking water worldwide [2]. Owing to population growth and agriculture intensification, nitrate concentrations in subsurface waters are expected to continue increasing [3]. Besides its direct impact on human health [4], nitrate can significantly alter the biogeochemistry of groundwater reservoirs [5]. Nitrate promotes the oxidation of sulfide and in particular of iron (Fe) – the most prevalent groundwater contaminant – leading to the formation of oxides with high adsorption capacity and the emission of greenhouse gases [6]. Despite these implications, the consequences of nitrate–iron interactions on ecosystems and drinking water production systems remain largely unexplored. A detailed understanding of the underlying principles is paramount for anticipating and mitigating current and future challenges,

as well as for exploring potential synergies and biotechnological opportunities.

Nitrate-dependent iron-oxidizing (NDFO) bacteria, also referred to as nitrate-reducing iron-oxidizers (NRFO) [7, 8], couple the anoxic reduction of nitrate to the oxidation of  $\text{Fe}^{2+}$  (eq. 1). Since their discovery in 1996 by Straub *et al.* [9], NDFO microorganisms have been the focus of extensive research both in pure and mixed cultures (reviewed in [10]), and several complete genomes are already publicly available [11, 12]. The metabolic versatility of NDFO bacteria spans from lithoautotrophic to mixotrophic growth [10], to partial denitrification using nitric oxide (NO) [13] and nitrous oxide ( $\text{N}_2\text{O}$ ) [11] as terminal electron acceptors. At the same time, due to the inherently low energetic yield of iron oxidation, NDFO bacteria live close to the thermodynamic edge [14]. Their fitness is highly dependent on environmental factors such as substrate and product availability, pH and temperature [15]. Chemical reactions – such as the quasi-instantaneous

Received: 16 September 2023. Revised: 3 January 2024. Accepted: 17 January 2024

© The Author(s) 2024. Published by Oxford University Press on behalf of the International Society for Microbial Ecology.

This is an Open Access article distributed under the terms of the Creative Commons Attribution License (<https://creativecommons.org/licenses/by/4.0/>), which permits unrestricted reuse, distribution, and reproduction in any medium, provided the original work is properly cited.

precipitation of the biologically formed  $\text{Fe}^{3+}$  – can play a pivotal role by modulating iron and nitrogen concentrations [16]. However, our current understanding is largely based on laboratory settings, and does not necessarily reflect the complexity of natural and engineered ecosystems where several (a)biotic reactions occur simultaneously at temperatures significantly lower than tested to date [17].

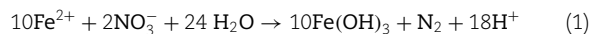

To address these knowledge gaps, we established a pilot-scale filter on anoxic groundwater containing both  $\text{Fe}^{2+}$  and  $\text{NO}_3^-$ . The emulated groundwater conditions allowed for the establishment of a microbial enrichment that simultaneously removed  $\text{Fe}^{2+}$  and  $\text{NO}_3^-$ . In depth metagenomic analysis of the steady-state community revealed a new order-level NDFO lineage, deepening our understanding of their taxonomic diversity and ecological roles. Overall, our study bridges the gap between laboratory studies and real-world conditions, and offers a nuanced view on the intricate interplay between nitrate and iron in groundwater ecosystems.

## Results

### Nitrate-dependent iron removal irrespective of the limiting nutrient

A pilot-scale, granular activated-carbon filter was fed with nitrate-rich anoxic groundwater for 120 days. Stable anoxic nitrate and iron removals were achieved after less than 3 weeks of operation and maintained for over 100 days (Fig. 1). With nitrate as the limiting nutrient at both groundwater ( $8.9 \pm 2.8 \mu\text{M}$ ) and nitrate-amended concentrations ( $13.5 \pm 1.5$  and  $20.2 \pm 2.4 \mu\text{M}$ ), effluent nitrate concentrations were consistently below detection limit ( $1 \mu\text{M}$ ). Throughout the nitrate-limiting period,  $\text{NO}_3^-$  and  $\text{Fe}^{2+}$  were consumed at a  $7.1 \pm 1.4 \text{ Fe}^{2+}:\text{NO}_3^-$  molar ratio (Fig. S3). Oxygen was always below the quantification limit of  $3 \mu\text{M}$ . Roughly  $80 \mu\text{C-mol}$  dissolved organic carbon ( $\text{DOC-l}^{-1}$ ) was consistently removed from the influent, likely due to  $\text{Fe}^{2+}$ -DOC complexes formation owing to the non-biodegradable nature of organic matter in the groundwater matrix ( $<1.2 \mu\text{C-mol-l}^{-1}$  assimilable organic matter). Ammonia consumption was negligible ( $<0.1 \mu\text{M}$ ). Effluent nitrite concentrations stayed below the detection limit ( $<0.2 \mu\text{M}$ ), while other denitrification intermediates – nitric oxide and nitrous oxide – were not measured. The observed consistent stoichiometric coupling between nitrate and iron removals strongly suggests  $\text{Fe}^{2+}$  oxidation to be primarily driven by microbial nitrate-reducing iron oxidation.

### Microbial community dominated by iron oxidizers and denitrifiers

Metagenomic DNA sequencing yielded a total of 107 512 and 8 754 261 quality filtered short and long reads, respectively. After assembly and polishing, this resulted in 19 127 contigs with an N50 value of 15 927. Contigs binning resulted in 13 high ( $>90\%$  completeness and  $<5\%$  contamination; containing full-length 23S, 16S, and 5S ribosomal RNA genes and  $\geq 18$  transfer RNA genes) and medium (completeness  $>50\%$  and contamination  $<10\%$ ) quality metagenome assembled genomes (MAGs) as defined by [18] with a relative abundance exceeding 0.5% of the quality filtered long reads. Collectively, these 13 most abundant genomes accounted for 66.9% of the total quality filtered reads, and belonged to four phyla: *Proteobacteria* (51.6%), *Actinobacteria* (8.3%), *Bacteroidetes* (5.6%), and *Chloroflexi* (1.4%) (Table 1). All genomes

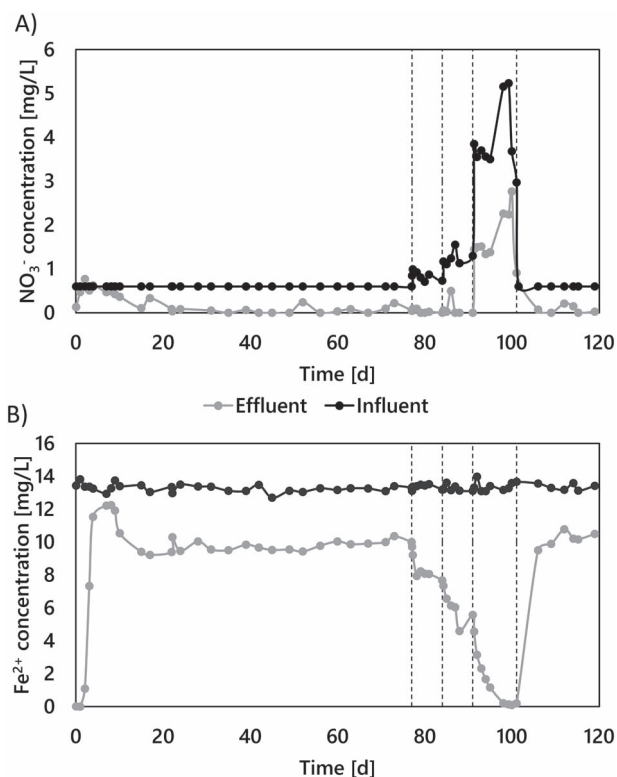

**Figure 1.** Simultaneous  $\text{NO}_3^-$  (A) and  $\text{Fe}^{2+}$  (B) removals in the groundwater-fed pilot-scale filter during the 120 days of continuous operation. The groundwater  $\text{Fe}^{2+}$  concentration was constant throughout the experiment ( $236 \pm 4 \mu\text{M}$ ).  $\text{NO}_3^-$  was dosed in the influent to increase the natural groundwater concentration in steps from  $8.1 \pm 2.1$  to  $20.2 \pm 2.4 \mu\text{M}$  ( $\text{NO}_3^-$  limitation), and up to  $83.8 \pm 0.6 \mu\text{M}$  ( $\text{Fe}^{2+}$  limitation).  $\text{Fe}^{2+}$  and  $\text{NO}_3^-$  were proportionally removed throughout the whole experiment, regardless of the limiting nutrient (see Fig. S1 3).

in the community contained at least one gene encoding for a denitrifying enzyme, and five featured the genetic potential for iron oxidation. Notably, all putative iron oxidizers also possessed the genetic repertoire for carbon fixation. The most abundant MAG (MAG.13), accounting for 19.3% of the community, could only be taxonomically classified at class level (*Gammaproteobacteria*). Given its high abundance and potential metabolic relevance, the taxonomy and metabolic potential of MAG.13 was further investigated (Table S1).

### “*Candidatus Siderophilus nitratireducens*” represents a new order within Gammaproteobacteria

Our phylogenomic analysis based on the concatenated amino acid sequences of 120 bacterial single copy conservative marker genes revealed that MAG.13 (98.6% completeness, 1.7% contamination) belongs to a bacterium forming a new order-level lineage Ga0077554 (GTDB release 08-RS214), within the class *Gammaproteobacteria*, with no known closely related pure-culture representatives (Fig. 2). We propose to name the new species “*Candidatus Siderophilus nitratireducens*” gen.nov., sp.nov., a member of the *Candidate* order and family *Siderophiliales* and *Siderophiliaceae*, respectively. This lineage, along with several other MAGs from similar groundwater habitats [21], is mostly related to lineages including lithoautotrophic sulfur-oxidizing bacteria from the genera *Sulfuriflexus*, *Thioalbus*, and the members of the order *Thiohalomonadales*, including *Thiohalomonas*, *Sulfurivermis*, and *Thiohalophilus*. Average nucleotide identity and in-silico calculated

**Table 1.** General characteristics of the MAGs recovered from the pilot-scale filter. The last three columns indicate the presence/absence of the essential genes for iron oxidation, denitrification, and carbon fixation via the reductive phosphate pentose phosphate cycle. Cov\_il and cov\_np are the coverage with Illumina short reads and Nanopore long reads, respectively.

| MAG ID | Phylogenetic affiliation                  | Phylum         | Relative abundance (%) | Scaffolds | N50      | GC (%) | Completeness (%) | Contamination (%) | cov_il | cov_np | Coding genes | MAG quality | Iron oxidation <sup>a</sup> | Denitrification <sup>b</sup>                                                                    | Carbon fixation <sup>c</sup> |
|--------|-------------------------------------------|----------------|------------------------|-----------|----------|--------|------------------|-------------------|--------|--------|--------------|-------------|-----------------------------|-------------------------------------------------------------------------------------------------|------------------------------|
| MAG.13 | **Candidatus Siderophilus nitratireducens | Proteobacteria | 19.3                   | 9         | 18,97007 | 56     | 98.59            | 1.73              | 298.27 | 300.86 | 3217         | High        | Yes                         | NO <sub>3</sub> <sup>+</sup> → NO <sub>2</sub> <sup>-</sup>                                     | Yes                          |
| MAG.26 | f_Gallionellaceae                         | Proteobacteria | 10.0                   | 10        | 5,69264  | 55     | 95.81            | 0.95              | 234.92 | 155.81 | 3749         | High        | Yes                         | NO <sub>3</sub> <sup>+</sup> → NO <sub>2</sub> <sup>-</sup> ; N <sub>2</sub> O → N <sub>2</sub> | Yes                          |
| MAG.18 | f_Anaeromyxobacteraceae                   | Proteobacteria | 8.6                    | 21        | 5,18414  | 73     | 98.06            | 0.65              | 186.12 | 131.88 | 4018         | High        | No                          | N <sub>2</sub> O → N <sub>2</sub>                                                               | No                           |
| MAG.19 | g_Devosia                                 | Proteobacteria | 6.5                    | 27        | 41,38465 | 64     | 99.28            | 0.14              | 24.53  | 100.33 | 4029         | High        | No                          | NO <sub>2</sub> <sup>-</sup> → NO                                                               | No                           |
| MAG.10 | f_Chitinophagaceae                        | Bacteroidetes  | 5.6                    | 4         | 36,46631 | 40     | 97.54            | 0.9               | 304.83 | 87.01  | 3193         | High        | No                          | NO → N <sub>2</sub>                                                                             | No                           |
| MAG.03 | o_Nanopelagiales                          | Actinobacteria | 4.3                    | 11        | 7,79605  | 69     | 99               | 2.37              | 140.41 | 67.49  | 4065         | High        | No                          | NO <sub>3</sub> <sup>-</sup> → NO                                                               | No                           |
| MAG.27 | o_Nanopelagiales                          | Actinobacteria | 3.9                    | 9         | 11,66278 | 71     | 98.3             | 1.98              | 140.56 | 60.77  | 3910         | High        | No                          | NO <sub>3</sub> <sup>-</sup> → NO                                                               | No                           |
| MAG.34 | g_Gallionella                             | Proteobacteria | 3.5                    | 112       | 46607    | 57     | 95.91            | 3.25              | 64.39  | 52.65  | 2516         | High        | Yes                         | NO <sub>3</sub> <sup>-</sup> → NO                                                               | Yes                          |
| MAG.00 | o_Anaerolineales                          | Chloroflexi    | 1.4                    | 100       | 1,14338  | 55     | 97.27            | 2.91              | 21.93  | 20.04  | 4828         | High        | No                          | NO <sub>2</sub> <sup>-</sup> → NO                                                               | No                           |
| MAG.08 | g_Rhodoferrax                             | Proteobacteria | 1.2                    | 121       | 69171    | 63     | 88.95            | 2.37              | 33.64  | 17.42  | 3870         | Medium      | No                          | NO <sub>3</sub> <sup>-</sup> → NO                                                               | Yes                          |
| MAG.04 | f_Rhizobiaceae                            | Proteobacteria | 0.9                    | 115       | 80809    | 60     | 95.12            | 4.1               | 25.97  | 13.93  | 4768         | High        | No                          | NO <sub>3</sub> <sup>-</sup> → N <sub>2</sub> O                                                 | No                           |
| MAG.16 | f_Gallionellaceae                         | Proteobacteria | 0.9                    | 165       | 27226    | 56     | 88.51            | 3.94              | 52.76  | 13.55  | 3002         | Medium      | Yes                         | NO <sub>3</sub> <sup>-</sup> → N <sub>2</sub> O                                                 | Yes                          |
| MAG.29 | g_Rhizobacter                             | Proteobacteria | 0.7                    | 257       | 25511    | 66     | 94.54            | 4.54              | 21.73  | 9.94   | 4225         | Medium      | Yes                         | NO <sub>3</sub> <sup>+</sup> → NO <sub>2</sub> <sup>-</sup>                                     | Yes                          |

<sup>a</sup>Based on FeGenie [19]. “Yes” if either *cyc2*, *cyc1*, *foxABC*, *foxYZ*, *sulfocyanin*, *pioABC*, or *mtoAB* are present. <sup>b</sup>Based on GhostKOALA [20] and the presence of *napAB* or *narGHI* (K02567, K02568, or K00370, K00371, K00374; NO<sub>3</sub><sup>-</sup> → NO<sub>2</sub><sup>-</sup>), *nirK* or *nirS* (K00368, K15864; NO<sub>2</sub><sup>-</sup> → NO), *norBC* (K00376; N<sub>2</sub>O → N<sub>2</sub>) from denitrification (M00529). <sup>c</sup>Based on GhostKOALA [20]. “Yes” if either *rbcl* (K01601) or *rbcs* (K01602) and *prkB* (K00855) from reductive phosphate pentose phosphate cycle (Calvin Cycle) (M00165). \*\*Initially classified as *Candidatus Siderophilus nitratireducens*.

DNA–DNA hybridization comparison between “*Ca. Siderophilus nitratireducens*” and its closest relative, a MAG from a drinking water treatment plant (GCA\_001464965.1), indicated that the two organisms belong to the same genus but different species (ANI = 89%, DDH = 36.6%).

### Autotrophy in “*Ca. Siderophilus nitratireducens*”

To resolve the main anabolic and catabolic pathways of “*Ca. Siderophilus nitratireducens*,” open reading frames (ORFs) were predicted and annotated (Table 2, detailed version in Table S1). The genome contains marker genes coding for two key proteins of autotrophic CO<sub>2</sub> fixation via the reductive pentose phosphate (Calvin–Benson–Bassham; CBB) cycle, including the large and small subunits of the ribulose-1,5-bisphosphate carboxylase-oxygenase (*rbclS* form I) and the phosphoribulokinase (*prk*). Genes encoding for carboxysomal shell proteins and carbonic anhydrase were also present, further supporting the inorganic carbon uptake ability of “*Ca. Siderophilus nitratireducens*”. The absence of phosphofructokinase (*pfk*) indicates a modified glycolytic pathway initiating at the glyceraldehyde 3-phosphate level. All tricarboxylic acid (TCA) cycle genes were identified except for fumarate hydratase (*fh*). However, the glyoxylate shunt enzymes malate synthase (*glcB*) and isocitrate lyase (*aceA*) were present. Taken together, these findings suggest the capability for full autotrophic growth of “*Ca. Siderophilus nitratireducens*.”

### Iron oxidation in “*Ca. Siderophilus nitratireducens*”

The presence of a monoheme *c* cytochrome *cyc2* cluster 3, a primary iron oxidation gene, suggests that “*Ca. Siderophilus nitratireducens*” can use Fe<sup>2+</sup> as an electron donor. Other common Fe<sup>2+</sup> oxidases, namely the diheme *c* cytochrome *cyc1* and the multiheme *c* cytochromes *MtoA* and *MtoB*, were not annotated. Despite the close phylogenetic proximity to lithoautotrophic sulfur-oxidizing bacteria, the genes of sulfide dehydrogenases *Sqr* and *FccAB* and sulfite dehydrogenases *SorAB* and *SoeABC* were not identified.

In terms of potential catabolic electron acceptors, the genes for a periplasmic nitrate reductase (*napABCD* and its membrane ferredoxins *napGH*) and a *cbb*<sub>3</sub>-type cytochrome *c* oxidase (*ccoNOP*) were annotated. However, genes encoding for other known denitrification reductases, namely membrane-bound nitrate reductase (*narGHI*) and nitrite, nitric oxide and nitrous oxide reductases, *nirK/nirS*, *norBC*, and *nosZ* respectively, were not found (Table 2, detailed version in Table S1). Additionally, alternative oxidases, such as the cytochrome *bd* ubiquinol oxidase (*cydAB*) or the *aa*<sub>3</sub>-type cytochrome *c* oxidase (*coxABCD*) were not identified. Also, genes of dissimilatory sulfate reduction (*aprAB* and *dsrABC*) and the *sox* complex, responsible for sulfate reduction could not be identified. These findings suggest that “*Ca. Siderophilus nitratireducens*” relies exclusively on nitrate and oxygen as electron acceptors.

### On the thermodynamic feasibility of nap-dependent nitrate-reducing iron-oxidation

Based on its genome, “*Ca. Siderophilus nitratireducens*” is potentially an autotrophic organism that obtains energy by oxidizing Fe<sup>2+</sup> to Fe<sup>3+</sup> while reducing NO<sub>3</sub><sup>-</sup> to NO<sub>2</sub><sup>-</sup>. Yet, as iron is a weak electron donor, the standard Gibbs free energy of the reaction is positive under standard biological conditions (pH 7). The process

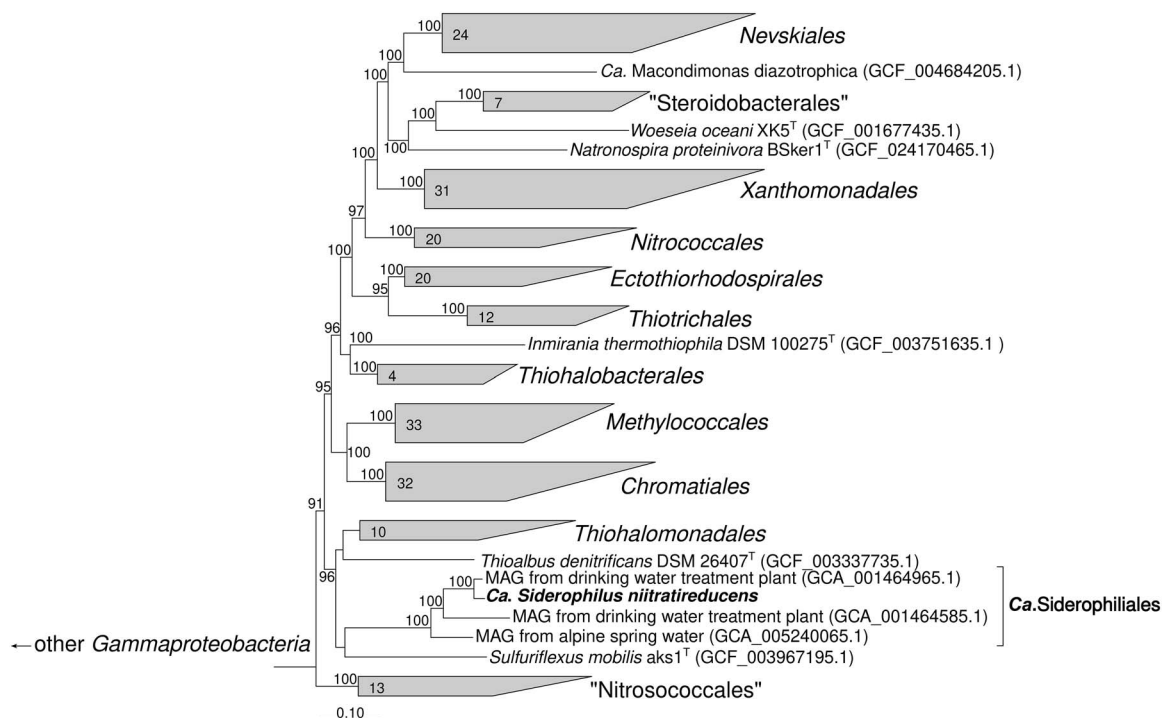

**Figure 2.** Phylogenetic position of the “*Ca. Siderophilus nitratreducens*” based on sequence analyses of concatenated alignment of 120 single-copy conserved bacterial protein markers [22] – taxonomic designations correspond to the Genome Taxonomy DataBase 207). The trees were built using IQ-TREE2 [23] with approximate likelihood-ratio test for branches [24]. Bootstrap consensus tree is shown with values above 90% placed at the nodes. Bar, 0.10 changes per position.

**Table 2.** Key enzyme of the main catabolic and anabolic pathways of “*Ca. Siderophilus nitratreducens*.” “+” and “-” indicate presence or absence in the genome. CBB, Calvin–Benson–Bassham cycle; TCA, Tricarboxylic acid cycle/Krebs cycle.

| Electron acceptor |                           |          | Electron donor |               |          | Carbon fixation |                      |          | Carbon metabolism |               |                  |
|-------------------|---------------------------|----------|----------------|---------------|----------|-----------------|----------------------|----------|-------------------|---------------|------------------|
| Element           | Key genes                 | Presence | Element        | Key genes     | Presence | Pathway         | Key genes            | Presence | Pathway           | Key genes     | Presence         |
| Nitrogen          | <i>nap</i> ABCD           | +        | Iron           | <i>cyc2</i>   | +        | CBB             | <i>rbc</i> LS form I | +        | Glycolysis        | <i>pfk</i>    | -                |
|                   | <i>nar</i> GHI            | -        |                | <i>cyc1</i>   | -        |                 | <i>prk</i>           | +        |                   | <i>gpml</i>   | +                |
|                   | <i>nirKS/norBC/nosZ</i> - | -        |                | <i>mto</i> AB | -        |                 | Carboxysome          | +        |                   | TCA cycle     | <i>cs / gltA</i> |
| Sulfur            | <i>apr</i> AB             | -        | Sulfur         | <i>sqr</i>    | (+)      |                 |                      |          |                   | <i>suc</i> AB | +                |
|                   | <i>sox</i> XABYZ(CD)      | -        |                | <i>fcc</i> AB | -        |                 |                      |          |                   | <i>fh</i>     | -                |
| Oxygen            | <i>cco</i> NOP            | +        |                |               |          |                 |                      |          |                   | <i>mdh</i>    | +                |
|                   | <i>qox</i> ABCD           | -        |                |               |          |                 |                      |          | Glyoxylate shunt  | <i>glc</i> B  | +                |
|                   | <i>cyd</i> ABX            | -        |                |               |          |                 |                      |          |                   | <i>ace</i> A  | +                |

is therefore thermodynamically unfavorable:

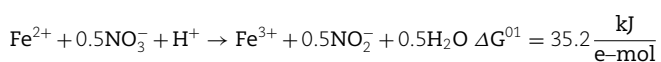

However, the exceptionally low solubility constants of iron oxides, ranging from  $10^{-34}$  to  $10^{-42}$  [25] result in very low  $\text{Fe}^{3+}$  concentrations. Thereby, precipitation creates the conditions for a favorable thermodynamic driving force for the oxidation of  $\text{Fe}^{2+}$  to  $\text{Fe}^{3+}$  [26]. Under the operational conditions of this study (283 K,  $<1 \mu\text{molNO}_3^- \cdot \text{l}^{-1}$ ,  $<0.2 \mu\text{molNO}_2^- \cdot \text{l}^{-1}$  in the effluent), the reaction becomes thermodynamically favorable owing to the calculated  $\text{Fe}^{3+}/\text{Fe}^{2+}$  ratio in the order of  $10^{-16}$  (conservative value, see Section 4.2):

$$\Delta G^1 = \Delta G_r^0 + RT \ln \left[ \frac{[\text{Fe}^{3+}][\text{NO}_2^-]^{\frac{1}{2}}}{[\text{Fe}^{2+}][\text{NO}_3^-]^{\frac{1}{2}}} \right] = -66.2 \frac{\text{kJ}}{\text{e-mol}}$$

A Gibbs free energy of  $-66 \text{ kJ/e-mol}$  is in principle enough to transport three to four protons over the cytoplasmic membrane, considering a value of  $15 \text{ kJ} \cdot \text{mol}_{\text{H}^+}^{-1}$  [27], and would yield at least one ATP. If other iron precipitation products are formed, the redox potential of  $\text{Fe}^{2+}/\text{Fe}^{3+}$  increases further. Even at more conservative  $\text{Fe}^{3+}/\text{Fe}^{2+}$  ratios and pH, due to non-equilibrium conditions and product gradients, the biological process remains favorable (Fig. 3).

### Complete denitrification: a collaborative effort of iron-oxidizing autotrophs and organoheterotrophs

Iron oxidation genes were identified in five MAGs, namely MAG.13 (“*Ca. Siderophilus nitratreducens*”), MAG.29 (*g\_Rhizobacter*) and MAG.26, MAG.34 and MAG.16 (*f\_Gallionellaceae*, commonly associated with autotrophic iron oxidation). These MAGs also encoded for the central enzymes of the carbon dioxide fixation

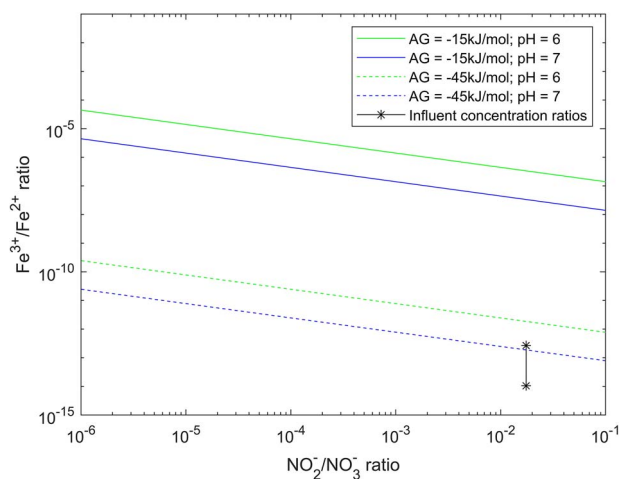

**Figure 3.** Gibbs energy dissipated during nitrate-reducing iron oxidation as function of the ratio of substrates and products. As reference, lines represent the ratios at which the minimum energy required to generate pmf ( $-15 \text{ kJ}\cdot\text{mol}^{-1}$ , full lines) and ATP ( $-45 \text{ kJ}\cdot\text{mol}^{-1}$ , dashed lines) is generated at intracellular pH of 6 (green) or 7 (blue) ([27]). Star dots represent the actual ratios based on measured ( $\text{NO}_2^-/\text{NO}_3^-/\text{Fe}^{2+}$ ) and calculated ( $\text{Fe}^{3+}$ ) influent reactor concentrations. Note that  $\text{NO}_2^-$  was below detection limit ( $< 0.2 \mu\text{mol}\cdot\text{l}^{-1}$ ), so that the actual reactor conditions were likely even more favorable, i.e. more on the left.

via the CBB cycle. While all 13 MAGs contained genes encoding for at least one denitrification enzyme (Table 2), none of them possessed a comprehensive gene set to fully reduce nitrate to dinitrogen gas. Dissimilatory nitrate reduction to nitrite, the first denitrification step, was present in nine MAGs, while the final step, nitrous oxide reduction to nitrogen gas, was only found in MAG.26 (*g\_Rhizobacter*), MAG.18 (*f\_Anaeromyxobacteraceae*) and MAG.10 (*f\_Chitinophagaceae*). The five most abundant MAGs ( $>5\%$ ) alone accounted for up to 50% of the community and covered the full denitrification (Fig. 4). All putative iron oxidizers also possessed the genetic potential for aerobic respiration (i.e. they contained *cbb*<sub>3</sub>-type terminal oxidases). Interestingly, two distinct potential niches were identified. The autotrophic iron oxidizers, “*Ca. Siderophilus nitratreducens*” and MAG.26 (*f\_Gallionelleceae*), performed the initial nitrification reductions, while the lower-abundant organoheterotrophs complemented the reduction of (at least) NO to nitrous oxide possibly taking advantage of the autotrophically fixed carbon excreted by the iron oxidizers. Due to the absence of sufficient biodegradable organic matter in the influent, a portion of the biologically generated NO was likely reduced to  $\text{N}_2\text{O}$  chemically with  $\text{Fe}^{2+}$  [28].

## Discussion

We established a pilot-scale filter on nitrate-rich anoxic groundwater to elucidate the structure and metabolism of nitrate-reducing iron-oxidizing microbial communities under oligotrophic conditions mimicking natural groundwater. The enriched microbial community stoichiometrically removed iron and nitrate during more than 4 months, and was dominated by a genome belonging to a new Candidate order, named Siderophiliales. The genome of this new species, “*Ca. Siderophilus nitratreducens*,” encoded the genes for iron oxidation (cytochrome *c* *cyc2*) and, within the denitrification pathway, the periplasmic nitrate reductase (*nap*). The absence of other denitrification genes suggests a short catabolic path, which may offer a kinetic advantage in

terms of higher iron oxidation rates [29] especially under nitrogen limiting conditions [30]. In contrast, the majority of NDFO genomes reported so far encode the membrane-bound nitrate reductase (*nar*) along with other downstream denitrification genes [11, 31–34]. *Nar* actively translocates protons, whereas *nap* conserves energy only indirectly by accepting electrons from the quinol pool on the periplasmic side of the membrane, effectively consuming cytoplasmic protons [35]. Recently, novel Zetaproteobacteria genomes possessing *nap* have been recovered from a complex community, yet they also possessed at least another energy conserving nitrogen oxide [5, 36]. The presence of a *cbb*<sub>3</sub>-type cytochrome *c* oxidase suggests that “*Ca. Siderophilus nitratreducens*” may also be capable of oxygen respiration. This is consistent with the fact that all reported genomes of anaerobic iron-oxidizing bacteria contain oxygen reductases [31, 34, 37], including the well-studied KS [13] and AG [38] cultures. However, to the best of our knowledge, NDFO growth under (micro)aerophilic conditions has not been reported to date [11]. Although the sporadic detection of traces of oxygen ( $< 3 \mu\text{M}$ ) in our filter does not allow to fully exclude aerobic activity, and in the absence of cultured representatives to confirm it, we posit that *nap*-driven iron oxidation was the primary catabolic route of “*Ca. Siderophilus nitratreducens*” under the *in-situ* restricted availability of alternative substrates. Furthermore, “*Ca. Siderophilus nitratreducens*” was also identified as a putative autotroph, adding the additional challenge of energy and electrons needs for anabolic  $\text{CO}_2$  fixation to the growth on iron, a weak electron-donor at standard conditions [15]. Thermodynamic evaluations indicate that *nap*-dependent iron oxidation can sustain growth at realistic  $\text{Fe}^{3+}/\text{Fe}^{2+}$  and  $\text{NO}_3^-/\text{NO}_2^-$  concentrations ratios. To this end, the quasi-instantaneous precipitation of the biologically formed  $\text{Fe}^{3+}$  as iron oxides under circum-neutral pH plays a central role as thermodynamic driving force [39]. The specific mechanisms by which this thermodynamic potential is harnessed for carbon fixation remain to be fully elucidated.

The subsequent reduction of the produced nitrite resulted from the concerted activity of putative autotrophic iron-oxidizers and organoheterotrophs. Within the microbial community, the second most abundant genome, MAG.26 (*f\_Gallionelleceae*), featured the genetic potential for iron oxidation and most denitrification steps, with the exception of nitrous oxide reductase (*nor*). MAG.26 also possessed the cytochrome *c* oxidase *cbb*<sub>3</sub>-type *ccoNOP* for aerobic respiration. Interestingly, this genome contained genes for  $\text{CO}_2$  fixation, a trait mirrored in all other less abundant genomes with the ability to oxidize iron. This suggests that autotrophy may represent an essential trait for NDFOs in anoxic groundwaters where the dissolved organic carbon is largely non-biodegradable [40]. The three second most abundant genomes, MAG.18 (*f\_Anaeromyxobacteraceae*), MAG.19 (*g\_Devosia*) and MAG.10 (*f\_Chitinophagaceae*) were found to lack the genes for iron oxidation and  $\text{CO}_2$  assimilation. Yet, these genomes encompassed the full denitrification pathway starting from nitrite. Besides the likely occurrence of chemical reduction of NO to  $\text{N}_2\text{O}$  [41], we speculate that these heterotrophs complemented the NDFOs for at least the reduction of NO using autotrophically fixed organic carbon as substrate. A similar metabolic network was also recently observed in mesophilic NDFO communities [13]. Overall, the measured iron and nitrate consumption yield of  $7.1 \text{ mol Fe}^{2+}:\text{mol NO}_3^-$  is consistent with the expected 5.6, i.e. considering the theoretical catabolism (eq. 1) and the recently estimated 12% of electrons used for growth [7], but higher than the experimentally observed range of 3.8–4.7 [9, 31, 42]. At first, we hypothesized nitrate ammonification to be the reason for

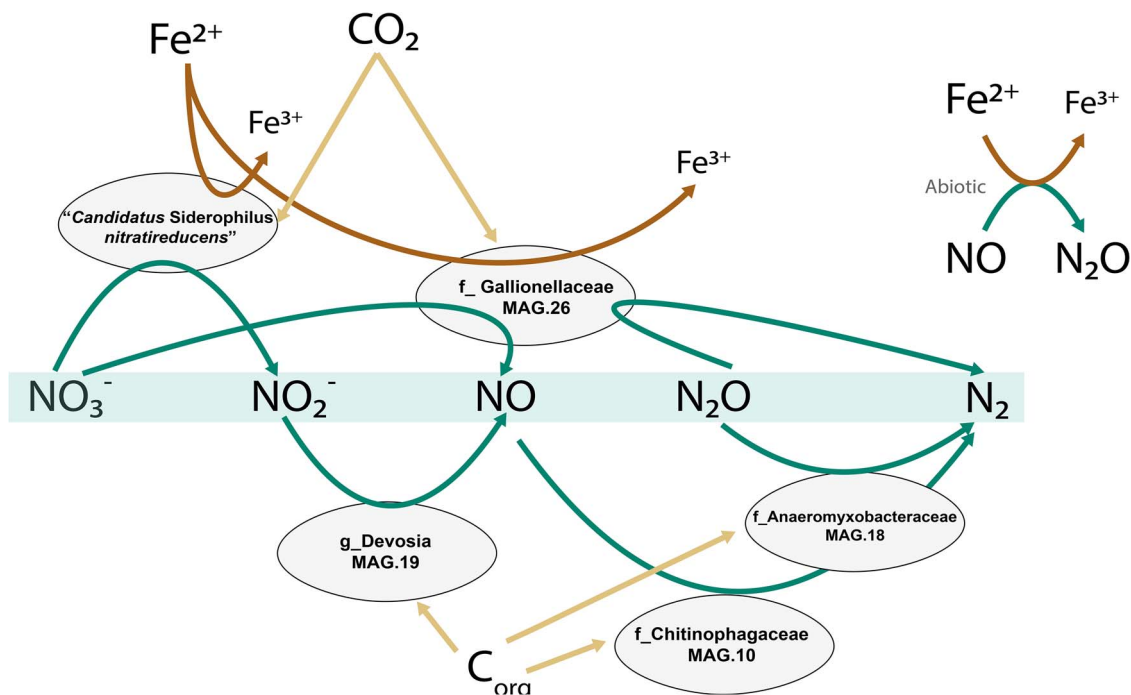

**Figure 4.** Genome-based conceptual model of substrate fluxes within the microbial community represented by the five most abundant MAGs. Putative autotrophic iron oxidizers perform the upstream part of denitrification, while flanking communities reduce the toxic intermediates to innocuous dinitrogen gas. The putative autotrophic metabolism was inferred based on the presence of ribulose-1,5-biphosphate carboxylase/oxygenase (RuBisCO) and phosphofructokinase (pfk).

the slight excess in iron oxidation, yet none of the putative iron-oxidizing genomes encoded for the common *nrf* nor for the newly reported octaheme complex [43]. Also, the oxygen sporadically detected in the influent was always below the quantification limit of  $3 \mu\text{M}$ , a conservative concentration that alone would explain less than 15% of the total iron consumption via chemical oxidation. As no  $\text{Fe}^{3+}$  was detected in the reactor effluent, all iron necessarily accumulated inside the reactor either as  $\text{Fe}^{2+}$  or  $\text{Fe}^{3+}$  precipitates. X-ray diffraction and Mössbauer spectroscopy identified over 94% of the Fe in solids as amorphous ferrihydrite, an  $\text{Fe}^{3+}$  oxide, with <6% of the solids attributed to magnetite, an  $\text{Fe}^{2+}$ - $\text{Fe}^{3+}$  oxide typically formed under anaerobic conditions (Figure S4, Table S2 and SI 5). Consequently, the  $\text{Fe}^{2+}$  unaccounted for was likely continuously adsorbed onto the newly-formed  $\text{Fe}^{3+}$  oxides, a well-studied phenomenon [44], yet the extent to which this occurred was not investigated. In conclusion, pending experimental validation, we surmise that NDFO microorganisms may not only contribute to iron removal by direct oxidation but also by continuously providing newly-formed iron oxides for its adsorption.

### Description of “*Ca. Siderophilus nitratireducens*” gen. nov., sp. nov.

*Siderophilus* (Si.de.ro'phi.lus Gr. masc.n. *sidēros* iron; Gr. masc. adj. *philos* loving; N.L. masc. n. *Siderophilus*, loving iron).

*ni.tra.ti.re.du'.cens* (N.L. masc. n. *nitras* (*gen. nitratitis*), nitrate; L. pres. part. *reducens*, converting to a different state; N.L. part. adj. *nitratireducens*, reducing nitrate).

Autotrophic nitrate-reducing iron-oxidizing bacterium isolated from a filtration unit fed with anaerobic groundwater with iron(II) and nitrate. Harbors also have the genetic potential to aerobically oxidize iron.

## Materials and methods

### Groundwater and pilot-scale filter characteristics

An iron reducing microbial community was enriched anoxically on the granular activated carbon of a 10-L pilot-scale filter in Emmen (the Netherlands) (Figs S1 and S2 and Table S1). The media was devoid of any previously formed biofilm. The anoxic, nitrate-rich groundwater ( $-75.2 \pm 28.4 \text{ mV}$ ) featured constant  $\text{Fe}^{2+}$  and  $\text{NO}_3^-$  concentrations,  $236 \pm 4 \mu\text{M}$  and  $8.1 \pm 2.1 \mu\text{M}$ , respectively (Table 3). Oxygen was consistently below quantification limit ( $3 \mu\text{M}$ ). The groundwater pH and temperature were  $6.7 \pm 0.2$  and  $10.5 \pm 0.1^\circ\text{C}$ , respectively. The filter was operated at a filtration flowrate of  $3.8 \text{ m}\cdot\text{h}^{-1}$  ( $29.6 \text{ L}\cdot\text{h}^{-1}$ ) during 120 days. After 75 days of steady-state operation, the influent nitrate concentration was manually increased in four steps up to  $83.8 \pm 0.6 \mu\text{M}$ , when the system changed from nitrate ( $\text{NO}_3^- < 1 \mu\text{M}$ ) to iron limiting conditions ( $\text{Fe}^{2+} < 4 \mu\text{M}$ ).

### Dissolved $\text{Fe}^{3+}$ estimation

At pH 7,  $\text{Fe}^{3+}$  has a markedly low solubility and precipitates as iron oxyhydroxide ( $\text{Fe}(\text{OH})_3$ ). Thermodynamically, this phase transition favors the oxidation of  $\text{Fe}^{2+}$  to  $\text{Fe}^{3+}$ , and the resulting low  $\text{Fe}^{3+}$  concentration is the primary driving force of equation 1 [45]. In our filter, the dissolved concentration of the  $\text{Fe}^{3+}$ , resulting from  $\text{Fe}^{2+}$  oxidation, was always below detection limit ( $0.01 \text{ mg}\cdot\text{l}^{-1}$ ). To discuss the thermodynamic feasibility of the NDFO process, we estimated the steady-state  $[\text{Fe}^{3+}]/[\text{Fe}^{2+}]$  ratio following the method proposed by Gorski et al. [39], which assumes thermodynamic equilibrium between  $[\text{Fe}^{2+}] - [\text{Fe}^{3+}] - [\text{FeOx}]$  phases based on the fact that the hydroxylation of dissolved  $\text{Fe}^{3+}$  is quasi-instantaneous at  $\text{pH} > 3$  [46]. Consequently, the following equation can be used to determine the  $\text{Fe}^{3+}$  concentration as function

**Table 3.** Influent and effluent water characteristics corresponding to average and standard deviation of daily measurements of Days 21–77, during the nitrate-limited steady-state. Fe<sup>3+</sup> was calculated as described in the following section.

| Parameter                    | Units                | Value               | Value             |
|------------------------------|----------------------|---------------------|-------------------|
|                              |                      | Influent            | Effluent          |
| pH                           |                      | 6.9 ± 0.4           | 6.7 ± 0.1         |
| T                            | °C                   | 10.5 ± 0.1          | 10.9 ± 0.6        |
| ORP                          | mV                   | −64 ± 17            | −58 ± 18          |
| O <sub>2</sub>               | μmol·L <sup>−1</sup> | <3 <sup>a</sup>     | <3 <sup>a</sup>   |
| NH <sub>4</sub> <sup>+</sup> | μmol·L <sup>−1</sup> | 11 ± 1.0            | 11 ± 8.1          |
| NO <sub>2</sub> <sup>−</sup> | μmol·L <sup>−1</sup> | <0.2 <sup>a</sup>   | <0.2 <sup>a</sup> |
| NO <sub>3</sub> <sup>−</sup> | μmol·L <sup>−1</sup> | 8.1 ± 2.1           | <1                |
| Fe <sup>2+</sup>             | μmol·L <sup>−1</sup> | 236 ± 4             | 178 ± 5           |
| Fe <sup>3+</sup>             | μmol·L <sup>−1</sup> | 2·10 <sup>−12</sup> |                   |
| DOC                          | mg·L <sup>−1</sup>   | 3.1 ± 0.1           | 2.0 ± 0.2         |

<sup>a</sup>Below detection limit

of pH and the solid solubility constant.

$$\{\text{Fe}_{\text{aq}}^{3+}\} \{\text{OH}^{-}\}^3 = K_{\text{sp}}$$

The most abundant iron oxide in the sand filter was amorphous ferrihydrite (SI 4 and 5), with a  $K_{\text{sp}}$  of 10<sup>−39</sup> [46]. Therefore:

$$\{\text{Fe}_{\text{aq}}^{3+}\} = \frac{10^{-39}}{(10^{-7.1})^3} = 2 \cdot 10^{-18} \text{ M}$$

## Analytic procedures

Samples for ammonium, nitrite, and nitrate quantification were immediately filtered through a 0.2 μm nanopore filter and measured within 12 h using photometric analysis (Gallery Discrete Analyzer, Thermo Fischer Scientific, Waltham, MA, USA). Samples for dissolved iron were filtered through a 0.2 μm nanopore filter, acidified to pH < 2 with H<sub>2</sub>SO<sub>4</sub>, and quantified by ICP-MS (Analytik Jena, Jena, Germany). Temperature, pH, oxidation–reduction potential (ORP), and dissolved oxygen concentration (DO) were monitored daily using a HI9829-01042 multiparameter analyzer (Hanna Instruments, Smithfield, RI, USA) in the raw water, after nitrate dosage and in the effluent.

## Biomass sampling, DNA extraction and quality control

Immediately after the end of the experiment, the filter was emptied and the medium grains were completely mixed. A small volume of grains was used for DNA extraction. Nucleic acid extraction was carried out using DNeasy PowerSoil Pro Kit (QIAGEN, Hilden, Germany) following manufacturer instructions. To improve DNA recovery and avoid the interference of carbon with the extraction, 25 μL of 20 g·l<sup>−1</sup> autoclaved (20 min, 121°C, 2 bar) skimmed milk solution (Sigma Aldrich, Saint Louis, MO, USA) were added to the extraction tube. After extraction, DNA was concentrated to 7.68 ng DNA·μl<sup>−1</sup> using Microcon centrifugal filter units YM-100 (MilliporeSigma, Burlington, MA, USA) following the manufacturer's instructions. DNA was quantified with the Qubit 4 Fluorometer and Qubit dsDNA HS assay kit (Invitrogen, Waltham, MA, USA) following the manufacturer's instructions. DNA purity was determined using a NanoDrop One Spectrophotometer (Thermo Fisher Scientific, Waltham, MA, USA).

## Library preparation, sequencing, and reads processing

Long-read and short-read DNA sequencing were carried out independently. Long-read library preparation was carried out using the ligation sequencing kit SQK-LSK 109 (Oxford Nanopore Technologies, Oxford, UK). R.9.4.1 flowcells on a GridION were used for sequencing. Raw data were basecalled in super-accurate mode using Guppy v.5.0.16 (<https://nanoporetech.com>). Raw reads were quality-filtered and trimmed using Filtlong (<https://github.com/rrwick/Filtlong>) to remove reads below 4000 kb and mean quality score below 80. Adapters were removed using Porechop v.0.2.3 (<https://github.com/rrwick/Porechop>).

Short-read library preparation was performed using the Nextera XT kit (Illumina, San Diego, CA, USA) according to the manufacturer's instructions. The libraries were pooled, denatured, and sequenced with Illumina MiSeq (San Diego, CA, USA). Paired end sequencing of 2 x 300 base pairs was performed using the MiSeq Reagent Kit v3 (San Diego, CA, USA) according to the manufacturer's instructions. Raw sequencing data were quality-filtered and trimmed using Trimmomatic v0.39 (HEADCROP:16 LEADING:3 TRAILING:5 SLIDINGWINDOW:4:10 CROP:240 MINLEN:35) [47]. Sequencing data quality was analyzed using FastQC v0.11.7 before and after trimming [48].

## Reads assembly and binning

Reads assembly and binning were done as in [49] with minor modifications. Long-reads were assembled using Flye v. 2.9-b1768 [50] with the “-meta” setting enabled and the “-nanohq” option. Polishing was carried out with Minimap2 v2.17 [51], Racon v. 1.3.3 [52], Medaka v1.4.4 (two rounds) (<https://github.com/nanoporetech/medaka>). At the end, short-reads were incorporated in a final round of polishing with Racon. Both long- and short-reads were independently mapped back to the assembled contigs using BWA-MEM2 [53]. SAMtools v1.14 was used to determine contig coverage and for indexing with default settings [54].

Automated binning was carried out with the long-reads assembly (polished with short-reads) using MetaBAT2 v. 2.12.1 [55] with “-s 500000,” MaxBin2 v. 2.2.7 [56], and Vamb v. 3.0.2 [57] with “-o C-minfasta 500000.” Additionally, contig coverage from the short-reads assembly was provided as input to the three binners to improve binning. Output integration and refinement was done in DAS Tool v. 1.1.2 [58]. CoverM v. 0.6.1 (<https://github.com/wwood/CoverM>) was applied to calculate the bin coverage (using the “-m mean” setting) and the relative abundance (“-m relative\_abundance”). Additional manual bin polishing was done in R using mmgenome (<https://github.com/MadsAlbertsen/mmgenome>).

## Assembly processing and gene annotation

The completeness and contamination of the genome bins were estimated using CheckM v. 1.1.2 [59]. The bins were classified using GDTB-Tk v. 1.5.0 [60] 202 database. Barnap v 0.9 (<https://github.com/tseemann/barnap>) and structRNAfinder [61] were used to predict 23S, 16S, and 5S ribosomal RNA sequences, and transfer RNA sequences were determined using tRNAscan-SE v.20 [62] with default search mode. Bins were classified using the Minimum Information about a Metagenome-Assembled Genome (MIMAG) standards [18]: high-quality bins were >90% complete and <5% contaminated, and contained full-length 23S, 16S, and 5S ribosomal RNA genes and ≥18 transfer RNA genes. Bins with completeness >50% and contamination <10% were classified as

medium-quality, and bins with completeness <50% and <10% contamination as low-quality bins. The remaining ones were considered contamination. 68% of the filtered reads rendered high- and medium-quality bins, 11% low-quality bins and 21.1% were unbinned.

The ORFs of the 10 resulting high-quality and 3 medium-quality bins with relative abundance >0.5% were predicted using Prodigal v2.6.3 [63] and functionally annotated with GhostKoala v2.2 [20] (Kyota Encyclopedia of Genes and Genomes; accessed March 2022). FeGenie [19] was used to improve the annotation of the iron metabolism using the metagenomics (“-meta”) settings. To refine the annotation for MAG.13 (*Candidatus Siderophilus nitratreducens*), the genome was uploaded to the National Center for Biotechnology Information (NCBI) database Prokaryotic Genome Annotation Pipeline v6.1 [64]. Additionally, manual annotation of genes potentially relevant but not automatically annotated was done by aligning a set of manually selected sequences from UniProtKB against the translated ORFs from MAG.13 with local blastp v2.13 [65]. After annotation, all the predicted genes of interest (manually and automatically annotated) were translated and aligned against the Non-redundant protein sequences (nr) database from NCBI using blastp (accessed June 2022) and accepted only if the coverage was >70% [19] and the identity >35% [66].

RStudio v1.4.1106 was used for data analysis and visualization.

### Phylogenetic tree construction

Genome-based phylogenetic reconstruction was done by using 120 bacterial single copy conservative marker genes, as described previously [60]. The trees were built using the IQ-TREE 2 [23] with fast model selection via ModelFinder [67] and ultrafast approximation for phylogenetic bootstrap [68], as well as approximate likelihood-ratio test for branches [24]. Whole genome comparison was conducted by using two different methods: Average Nucleotide Identity (ANI), using JSpeciesWS web server and DNA-DNA Hybridization (DDH) by the Genome-to-Genome Distance Calculator 2.1 online tool (<https://ggdc.dsmz.de/ggdc.php>) [69].

### Acknowledgements

The authors would like to thank Dimitry Sorokin (TU Delft and Russian Academy of Sciences) for the thorough discussions and invaluable insights; Martin Pabst and Dita Heikens (TU Delft) for the yet-unpublished proteomic data; Mantas Sereika, Thomas Nielsen, and Mads Albertsen (Aalborg University) for their help with Nanopore Sequencing and genome assembly and binning during the hands-on Nanopore course; Arjan I. Dugulan (Reactor Institute Delft) for the Mossbauer Analysis; and the anonymous Reviewer #2 for the insightful and constructive comments that significantly improved the manuscript.

### Author contributions

Francesc Corbera-Rubio, Jantinus Bruins, Mark C. M. van Loosdrecht, Doris van Halem, and Michele Laurenzi (conceived the study), Jantinus Bruins and Simon F. Dost (designed the filter and performed the on-site experiments), Francesc Corbera-Rubio (run the metagenomics analysis), and Alexander Y. Merkel (the phylogenetic classification). Francesc Corbera-Rubio and Gerben R. Stouten conducted the thermodynamics calculations. Simon Müller performed the solid characterization. Francesc Corbera-Rubio, Gerben R. Stouten, Mark C. M. van Loosdrecht, Doris van Halem, and Michele Laurenzi performed data analysis and/or helped interpret the results. Francesc Corbera-Rubio wrote the

manuscript, with contributions from Gerben R. Stouten, Mark C. M. van Loosdrecht, Doris van Halem, and Michele Laurenzi. All co-authors critically reviewed the manuscript and approved the final version.

### Supplementary material

Supplementary material is available at ISME Communications online.

### Conflicts of interest

None declared.

### Funding

This work was financed by the NWO partnership program “Dunea–Vitens: Sand Filtration” (project 17830) of the Dutch Research Council (NWO) and the drinking water companies Vitens NV and Dunea Duin & Water. M.L. was supported by NWO (VI.Veni.192.252).

### Data availability

Raw reads and MAGs have been deposited in the National Center for Biotechnology Information (NCBI) website (<https://www.ncbi.nlm.nih.gov/bioproject/>) under BioProject PRJNA834785. The BioSample accession numbers for the raw reads and the five most abundant MAGs are SAMN28600298, SAMN28058410 (“*Ca. Siderophilus nitratreducens*”), SAMN36381704 (*f\_Gallionellaceae*), SAMN36381891 (*f\_Anaeromyxobacteraceae*), SAMN36382736 (*g\_Devosia*), SAMN36401011 (*f\_Chitinophagaceae*).

### References

1. Matassa S, Batstone DJ, Hülsen T et al. Can direct conversion of used nitrogen to new feed and protein help feed the world? *Environ Sci Technol* 2015;**49**:5247–54. <https://doi.org/10.1021/es505432w>.
2. Giordano M. Global groundwater? Issues and solutions. *Annu Rev Environ Resour* 2009;**34**:153–78. Available from: <https://www.annualreviews.org/doi/abs/10.1146/annurev.enviro.030308.100251>.
3. Ward MH, Jones RR, Brender JD et al. Drinking water nitrate and human health: an updated review. *Int J Environ Res Public Health* 2018;**15**:1557–88. <https://doi.org/10.3390/ijerph15071557>.
4. WHO. *Guidelines for Drinking-Water Quality, 4th ed.* Resuscitation. Geneva: World Health Organisation, 2010, 26–8.
5. McAllister SM, Vandzura R, Keffer JL et al. Aerobic and anaerobic iron oxidizers together drive denitrification and carbon cycling at marine iron-rich hydrothermal vents. *ISME J* 2021;**15**:1271–86. Available from: <https://doi.org/10.1038/s41396-020-00849-y>. <https://www-nature-com.tudelft.idm.oclc.org/articles/s41396-020-00849-y>.
6. Schaedler F, Lockwood C, Lueder U et al. Microbially mediated coupling of Fe and N cycles by nitrate-reducing Fe(II)-oxidizing bacteria in littoral freshwater sediments. *Appl Environ Microbiol* 2018;**84**:1–14. <https://doi.org/10.1128/AEM.02013-17>.
7. Huang J, Mellage A, Garcia JP et al. Metabolic performance and fate of electrons during nitrate-reducing Fe(II) oxidation by the autotrophic enrichment culture KS grown at different initial Fe/N ratios. *Appl Environ Microbiol* 2023;**89**:e0019623. <https://doi.org/10.1128/aem.00196-23>.



8. Chen D, Cheng K, Liu T et al. Novel insight into microbially mediated nitrate-reducing Fe(II) oxidation by *Acidovorax* sp. strain BoFeN1 using dual N-O isotope fractionation. *Environ Sci Technol* 2023;**57**:12546–55. Available from: <https://doi.org/10.1021/acs.est.3c02329>. <https://pubmed.ncbi.nlm.nih.gov/37535944/>.
9. Straub KL, Benz M, Schink B et al. Anaerobic, nitrate-dependent microbial oxidation of ferrous iron. *Appl Environ Microbiol* 1996;**62**:1458–60. <https://doi.org/10.1128/aem.62.4.1458-1460.1996>.
10. Bryce C, Blackwell N, Schmidt C et al. Microbial anaerobic Fe(II) oxidation – ecology, mechanisms and environmental implications. *Environ Microbiol* 2018;**20**:3462–83. Available from: <http://doi.wiley.com/10.1111/1462-2920.14328>.
11. Huang YM, Jakus N, Straub D et al. '*Candidatus ferrigenium straubiae*' sp. nov., '*Candidatus ferrigenium bremense*' sp. nov., '*Candidatus ferrigenium altingense*' sp. nov., are autotrophic Fe(II)-oxidizing bacteria of the family Gallionellaceae. *Syst Appl Microbiol* 2022;**45**:126306. <https://doi.org/10.1016/j.syapm.2022.126306>.
12. Price A, Macey MC, Miot J et al. Draft genome sequences of the nitrate-dependent iron-oxidizing Proteobacteria *Acidovorax* sp. strain BoFeN1 and *Paracoccus pantotrophus* strain KS1. *Microbiol Resour Announc* 2018;**7**:1–2. <https://doi.org/10.1128/MRA.01050-18>.
13. Huang Y, Straub D, Blackwell N et al. Meta-omics reveal Gallionellaceae and Rhodanobacter species as interdependent key players for Fe(II) oxidation and nitrate reduction in the autotrophic enrichment culture KS. *Appl Environ Microbiol* 2021;**87**:e0049621. <https://doi.org/10.1128/AEM.00496-21>.
14. Weber KA, Achenbach LA, Coates JD. Microorganisms pumping iron: anaerobic microbial iron oxidation and reduction. *Nat Rev Microbiol* 2006;**4**:752–64. Available from: <https://doi.org/10.1038/nrmicro1490>. <https://digitalcommons.unl.edu/bioscifacpub>.
15. Hedrich S, Schlömann M, Barrie JOHNSON D. *The Iron-Oxidizing Proteobacteria* [Internet]. Vol. 157, Great Britain: Microbiology. Microbiology Society; 2011. 1551–64. Available from: <https://www.microbiologyresearch.org/content/journal/micro/10.1099/mic.0.045344-0>.
16. Kleerebezem R, Van Loosdrecht MCM. Thermodynamic and kinetic characterization using process dynamics: acidophilic ferrous iron oxidation by *Leptospirillum ferrooxidans*. *Biotechnol Bioeng* 2008;**100**:49–60. <https://doi.org/10.1002/bit.21745>.
17. Agudelo-Vera C, Avvedimento S, Boxall J et al. Drinking water temperature around the globe: understanding, policies, challenges and opportunities. *Water (Switzerland)* 2020;**12**:1049. <https://doi.org/10.3390/w12041049>.
18. Bowers RM, Kyrpides NC et al. Minimum information about a single amplified genome (MISAG) and a metagenome-assembled genome (MIMAG) of bacteria and archaea. *Nat Biotechnol* 2017;**35**:725–31. <https://doi.org/10.1038/nbt.3893>.
19. Garber AI, Nealson KH, Okamoto A et al. FeGenie: a comprehensive tool for the identification of iron genes and iron gene neighborhoods in genome and metagenome assemblies. *Front Microbiol* 2020;**11**:37. Available from: <https://doi.org/10.3389/fmicb.2020.00037>. <https://github.com/Arkadiy-Garber/FeGenie>.
20. Kanehisa M, Sato Y, Morishima K. BlastKOALA and GhostKOALA: KEGG tools for functional characterization of genome and metagenome sequences. *J Mol Biol* 2016;**428**:726–31. <https://doi.org/10.1016/j.jmb.2015.11.006>.
21. Pinto AJ, Marcus DN, Ijaz UZ et al. Metagenomic evidence for the presence of comammoxnitrospira-like bacteria in a drinking water system. *mSphere* 2016;**1**:1–15.
22. Parks DH, Chuvochina M, Waite DW et al. A standardized bacterial taxonomy based on genome phylogeny substantially revises the tree of life. *Nat Biotechnol* 2018;**36**:996–1004. Available from: <https://doi.org/10.1038/nbt.4229>. <https://www-nature-com.tudelft.idm.oclc.org/articles/nbt.4229>.
23. Minh BQ, Schmidt HA, Chernomor O et al. IQ-TREE 2: new models and efficient methods for phylogenetic inference in the genomic era. *Mol Biol Evol* 2020;**37**:1530–4. Available from: <https://doi.org/10.1093/molbev/msaa015>. <https://pubmed.ncbi.nlm.nih.gov/tudelft.idm.oclc.org/32011700/>.
24. Anisimova M, Gascuel O. Approximate likelihood-ratio test for branches: a fast, accurate, and powerful alternative. *Syst Biol* 2006;**55**:539–52. Available from: <https://doi.org/10.1080/10635150600755453>. <https://pubmed.ncbi.nlm.nih.gov/tudelft.idm.oclc.org/16785212/>.
25. Schwertmann U, Cornell RM, Rao CNR, et al. *The Iron Oxides*. 2nd ed, Synthesis. Weinheim, Germany: Wiley-VCH GmbH & Co. KGaA, 2003, 694.
26. Lees H, Kwok SC, Suzuki I. The thermodynamics of iron oxidation by the ferrobacilli. *Can J Microbiol* 1968;**12**:6–8.
27. Müller V, Hess V. The minimum biological energy quantum. Vol. 8, *Frontiers in Microbiology*. Switzerland: Frontiers Media S.A.; 2017. p. 2019.
28. Hayhurst AN, Lawrence AD. The reduction of the nitrogen oxides NO and N<sub>2</sub>O to molecular nitrogen in the presence of iron, its oxides, and carbon monoxide in a hot fluidized bed. *Combust Flame* 1997;**110**:351–65. [https://doi.org/10.1016/S0010-2180\(97\)00085-0](https://doi.org/10.1016/S0010-2180(97)00085-0).
29. Costa E, Pérez J, Kreft JU. Why is metabolic labour divided in nitrification? *Trends Microbiol* 2006;**14**:213–9. <https://doi.org/10.1016/j.tim.2006.03.006>.
30. Pessi IS, Viitamäki S, Virkkala AM et al. In-depth characterization of denitrifier communities across different soil ecosystems in the tundra. *Environ Microbiomes* 2022;**17**:30–17. Available from: <https://doi.org/10.1186/s40793-022-00424-2>.
31. Huang Y-M, Straub D, Kappler A et al. A novel enrichment culture highlights core features of microbial networks contributing to autotrophic Fe(II) oxidation coupled to nitrate reduction. *Microb Physiol* 2021;**31**:280–95. Available from: <https://doi.org/10.1159/000517083>. <https://www.karger.com/Article/FullText/517083>.
32. Cheng B, Wang Y, Hua Y et al. The performance of nitrate-reducing Fe(II) oxidation processes under variable initial Fe/N ratios: the fate of nitrogen and iron species. *Front Environ Sci Eng* 2021;**15**:73. Available from: <https://doi.org/10.1007/s11783-020-1366-2>.
33. Jamieson J, Prommer H, Kaksonen AH et al. Identifying and quantifying the intermediate processes during nitrate-dependent iron(II). *Oxidation* 2018;**52**:5771–81. Available from: <https://doi.org/10.1021/acs.est.8b01122>. <https://pubs.acs.org/sharingguidelines>.
34. He S, Tominski C, Kappler A et al. Metagenomic analyses of the autotrophic Fe(II)-oxidizing, nitrate-reducing enrichment culture KS. *Appl Environ Microbiol* 2016;**82**:2656–68. <https://doi.org/10.1128/AEM.03493-15>.
35. Simon J, van Spanning RJM, Richardson DJ. The organisation of proton motive and non-proton motive redox loops in prokaryotic respiratory systems. *Biochim Biophys Acta Bioenerg* 2008;**1777**:1480–90. <https://doi.org/10.1016/j.bbabi.2008.09.008>.
36. Chen J, Strous M. Denitrification and aerobic respiration, hybrid electron transport chains and co-evolution. *Biochim Biophys Acta Bioenerg* 2013;**1827**:136–44. <https://doi.org/10.1016/j.bbabi.2012.10.002>.

37. Hu M, Chen P, Sun W et al. A novel organotrophic nitrate-reducing Fe(II)-oxidizing bacterium isolated from paddy soil and draft genome sequencing indicate its metabolic versatility. *RSC Adv* 2017;**7**:56611–20. <https://doi.org/10.1039/C7RA09328D>.
38. Jakus N, Blackwell N, Straub D et al. Presence of Fe(II) and nitrate shapes aquifer-originating communities leading to an autotrophic enrichment dominated by an Fe(II)-oxidizing Gallionellaceae sp. *FEMS Microbiol Ecol* 2021;**97**:1–14. Available from: <https://doi.org/10.1093/femsec/fiab145>. <https://academic-oup-com.tudelft.idm.oclc.org/femsec/article/97/11/fiab145/6415198>.
39. Gorski CA, Edwards R, Sander M et al. Thermodynamic characterization of iron oxide-aqueous Fe<sup>2+</sup> redox couples. *Environ Sci Technol* 2016;**50**:8538–47. <https://doi.org/10.1021/acs.est.6b02661>.
40. Caltran I, Rietveld LC, Shorney-Darby HL et al. Separating NOM from salts in ion exchange brine with ceramic nanofiltration. *Water Res* 2020;**179**:115894. <https://doi.org/10.1016/j.watres.2020.115894>.
41. Van Cleemput O. Subsoils: chemo- and biological denitrification, N<sub>2</sub>O and N<sub>2</sub> emissions. *Nutr Cycl Agroecosystems* 1998;**52**:187–94. Available from: <https://link.springer.com/article/10.1023/A:1009728125678>.
42. Tominski C, Heyer H, Lösekann-Behrens T et al. Growth and population dynamics of the anaerobic Fe(II)-oxidizing and nitrate-reducing enrichment culture KS. *Appl Environ Microbiol* 2018;**84**:2173–90. Available from: <https://doi.org/10.1128/AEM.02173-17>. <http://aem.asm.org/>.
43. Sorokin DY, Tikhonova TV, Koch H et al. Trichlorobacter ammonificans, a dedicated acetate-dependent ammonifier with a novel module for dissimilatory nitrate reduction to ammonia. *ISME J* 2023;**17**:1–10. <https://doi.org/10.1038/s41396-023-01473-2>.
44. Fredrickson JK, Zachara JM, Kennedy DW et al. Biogenic iron mineralization accompanying the dissimilatory reduction of hydrous ferric oxide by a groundwater bacterium. *Geochim Cosmochim Acta* 1998;**62**:3239–57. [https://doi.org/10.1016/S0016-7037\(98\)00243-9](https://doi.org/10.1016/S0016-7037(98)00243-9).
45. Jolivet JP, Chanéac C, Tronc E. Iron oxide chemistry. From molecular clusters to extended solid networks. *Chem Commun* 2004;**4**:477–83. <https://doi.org/10.1039/B304532N>.
46. Vlek PLG, Blom TJM, Beek J et al. Determination of the solubility product of various iron hydroxides and Jarosite by the chelation method. *Soil Sci Soc Am J* 1974;**38**:429–32. <https://doi.org/10.2136/sssaj1974.03615995003800030018x>.
47. Bolger AM, Lohse M, Usadel B. Trimmomatic: a flexible trimmer for Illumina sequence data. *Bioinformatics* 2014;**30**:2114–20. Available from: <https://pubmed.ncbi.nlm.nih.gov/24695404/>.
48. Andrews S. FastQC: a quality control tool for high throughput sequence data [Online] [Internet]. 2010. Available from: <http://www.bioinformatics.babraham.ac.uk/projects/fastqc/>.
49. Sereika M, Kirkegaard RH, Karst SM et al. Oxford nanopore R10.4 long-read sequencing enables the generation of near-finished bacterial genomes from pure cultures and metagenomes without short-read or reference polishing. *Nat Methods* 2022;**19**:823–6. Available from: <https://doi.org/10.1038/s41592-022-01539-7>. <https://www.nature.com/articles/s41592-022-01539-7>.
50. Lin Y, Yuan J, Kolmogorov M et al. Assembly of long error-prone reads using de Bruijn graphs. *Proc Natl Acad Sci USA* 2016;**113**:E8396–405. Available from: <https://doi.org/10.1073/pnas.1604560113>.
51. Li H. Minimap2: pairwise alignment for nucleotide sequences. *Bioinformatics* 2018;**34**:3094–100. Available from: <https://doi.org/10.1093/bioinformatics/bty191>. <https://academic.oup.com/bioinformatics/article/34/18/3094/4994778>.
52. Vaser R, Sović I, Nagarajan N et al. Fast and accurate de novo genome assembly from long uncorrected reads. *Genome Res* 2017;**27**:737–46. Available from: <https://doi.org/10.1101/gr.214270.116>. <https://genome.cshlp.org/content/27/5/737.full>.
53. Vasmuddin M, Misra S, Li H et al. Efficient architecture-aware acceleration of BWA-MEM for multicore systems. In: *Proceedings - 2019 IEEE 33rd International Parallel and Distributed Processing Symposium, IPDPS 2019, Rio de Janeiro, Brazil. Institute of Electrical and Electronics Engineers Inc., Washington, USA, 2019, 314–24*.
54. Li H, Handsaker B, Wysoker A et al. The sequence alignment/map format and SAMtools. *Bioinformatics* 2009;**25**:2078–9. Available from: <https://pubmed.ncbi.nlm.nih.gov/19505943/>.
55. Kang DD, Li F, Kirton E, Thomas A, Egan R, An H, Wang Z. MetaBAT 2: an adaptive binning algorithm for robust and efficient genome reconstruction from metagenome assemblies. *PeerJ [Internet]* 2019;**7**:e7359. Available from: <https://doi.org/10.7717/peerj.7359>.
56. Wu YW, Simmons BA, Singer SW. MaxBin 2.0: an automated binning algorithm to recover genomes from multiple metagenomic datasets. *Bioinformatics* 2016;**32**:605–7. Available from: <https://doi.org/10.1093/bioinformatics/btv638>. [www.jbei.org](http://www.jbei.org).
57. Nissen JN, Johansen J, Allesøe RL et al. Improved metagenome binning and assembly using deep variational autoencoders. *Nat Biotechnol* 2021;**39**:555–60. <https://doi.org/10.1038/s41587-020-00777-4>.
58. CM KS, Probst AJ, Sharrar A et al. Recovery of genomes from metagenomes via a dereplication, aggregation and scoring strategy. *Nat Microbiol* 2018;**3**:836–43. Available from: <https://doi.org/10.1038/s41564-018-0171-1>. <https://www.nature.com/articles/s41564-018-0171-1>.
59. Parks DH, Imelfort M, Skennerton CT et al. CheckM: assessing the quality of microbial genomes recovered from isolates, single cells, and metagenomes. *Genome Res* 2015;**25**:1043–55. Available from: <https://doi.org/10.1101/gr.186072.114>. <https://genome-cshlp-org.tudelft.idm.oclc.org/content/25/7/1043.full>.
60. Parks DH, Chuvochina M, Chaumeil P-A et al. A complete domain-to-species taxonomy for bacteria and archaea. *Nat Biotechnol* 2020;**38**:1079–86. <https://doi.org/10.1038/s41587-020-0501-8>.
61. Arias-Carrasco R, Vázquez-Morán Y, Nakaya HI et al. StructRNAfinder: an automated pipeline and web server for RNA families prediction. *BMC Bioinformatics* 2018;**19**:1–7. Available from: <https://bmcbioinformatics.biomedcentral.com/articles/10.1186/s12859-018-2052-2>.
62. Chan PP, Lin BY, Mak AJ, Lowe TM. tRNAscan-SE 2.0: improved detection and functional classification of transfer RNA genes. *Nucleic Acids Res* 2021;**49**(16):9077–96. Available from: <https://academic-oup-com.tudelft.idm.oclc.org/nar/article/49/16/9077/6355886>. <https://doi.org/10.1093/nar/gkab688>.
63. Hyatt D, Chen GL, LoCascio PF et al. Prodigal: prokaryotic gene recognition and translation initiation site identification. *BMC Bioinformatics* 2010;**11**:1–11. Available from: <https://bmcbioinformatics.biomedcentral.com/articles/10.1186/1471-2105-11-119>.
64. Tatusova T, Dicuccio M, Badretdin A et al. NCBI prokaryotic genome annotation pipeline. *Nucleic Acids Res* 2016;**44**:6614–24. Available from: <https://doi.org/10.1093/nar/gkw569>. <https://pubmed.ncbi.nlm.nih.gov/tudelft.idm.oclc.org/27342282/>.

65. Altschul SF, Madden TL, Schäffer AA et al. Gapped BLAST and PSI-BLAST: a new generation of protein database search programs. *Nucleic Acids Res* 1997;**25**:3389–402. Available from: <https://doi.org/10.1093/nar/25.17.3389>. <https://academic-oup-com.tudelft.idm.oclc.org/nar/article/25/17/3389/1061651>.
66. Rost B. Twilight zone of protein sequence alignments. *Protein Eng Des Sel* 1999;**12**:85–94. Available from: <https://doi.org/10.1093/protein/12.2.85>. <https://academic-oup-com.tudelft.idm.oclc.org/peds/article/12/2/85/1550637>.
67. Kalyaanamoorthy S, Minh BQ, Wong TKF et al. ModelFinder: fast model selection for accurate phylogenetic estimates. *Nat Methods [Internet]* 2017;**14**:587–9. Available from: <https://doi.org/10.1038/nmeth.4285>. <https://pubmed-ncbi-nlm-nih-gov.tudelft.idm.oclc.org/28481363/>.
68. Thi Hoang D, Chernomor O, von Haeseler A et al. UFBoot2: improving the ultrafast bootstrap approximation. *Mol Biol Evol* 2017;**35**:518–22. Available from: <https://doi.org/10.1093/molbev/msx281>. <http://www.iqtree.org>.
69. Richter M, Rosselló-Móra R, Oliver Glöckner F et al. JSpeciesWS: a web server for prokaryotic species circumscription based on pairwise genome comparison. *Bioinformatics* 2016;**32**:929–31. Available from: <https://doi.org/10.1093/bioinformatics/btv681>. <http://jspecies.ribohost.com/>.
